# Supplementary material for: Multi-parametric imaging of the invasiveness-permissive acidic microenvironment in human glioma xenografts
Source: Royal Society of Chemistry journal article supplement (doi:10.1039/c5ra07685d), 2015-01-01
Supplement: c5ra07685d1.pdf [file c5ra07685d1.pdf]

## Multi-Parametric Imaging of Invasiveness-Permissive Acidic Microenvironment in Human Glioma Xenografts

Cuiyun Huang†, Huan Qin‡, Jun Qian†, Jingye Zhang†, Shengyuan Zhao†, Yinzhi Changyi†, Bingbing Li‡, Jianping Zhang§, Jianhua Zhu†, Da Xing‡, Sihua Yang‡,\* and Cong Li†,\*

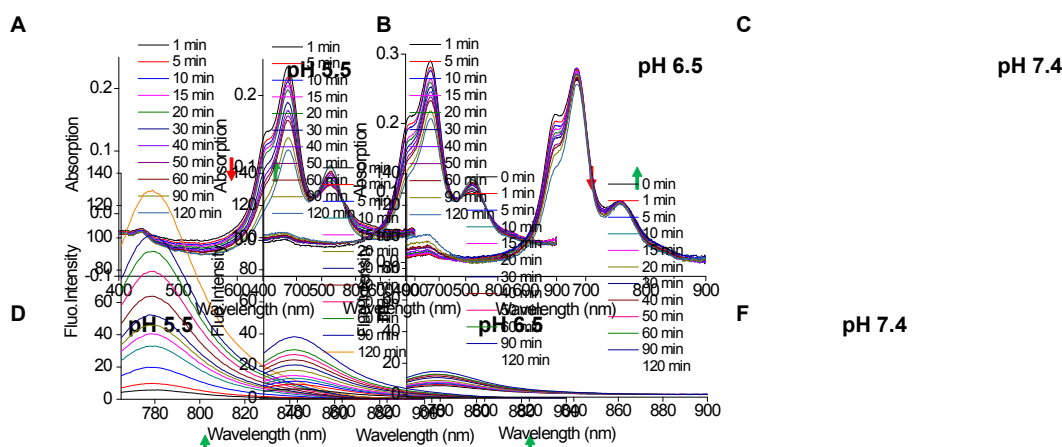

**Figure S1.** Time dependent absorption spectra (A–C) and emission spectra (D–F) of DiIRB-S in buffered solutions at pH 7.4, 6.5 and 5.5 with a final concentration of 1.0  $\mu\text{M}$ .

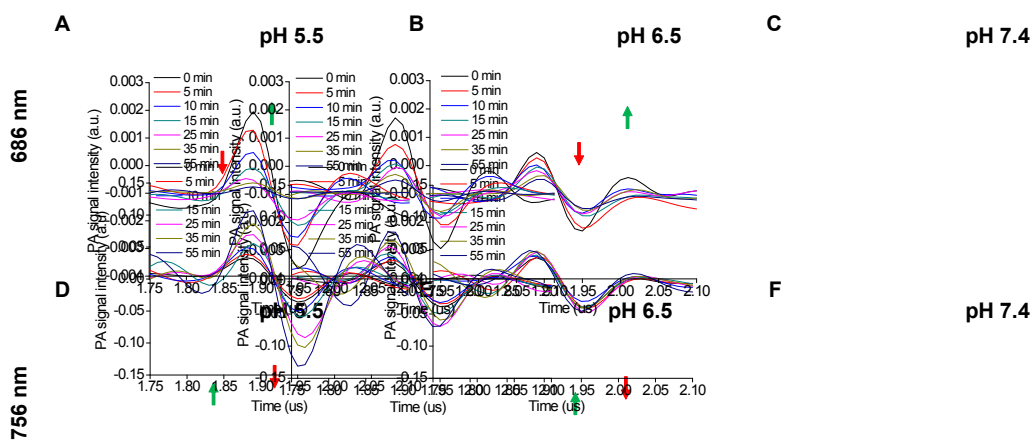

**Figure S2.** Time dependent photoacoustic spectra at dual wavelength 686 nm (A–C) and 756 nm (D–F) of DiIRB-S in buffered solutions at pH 7.4, 6.5 and 5.5 with a final concentration of 1.0  $\mu\text{M}$ .
